# Supplementary material for: What climate signal is contained in decadal to centennial scale isotope variations from Antarctic ice cores?
Source: Copernicus journal article supplement (doi:10.5194/cp-2018-112), 2018-08-27
Supplement: Supplementary file [file cp-2018-112-AC3-supplement.pdf]

Author Reply to the Editor Comment by Lukas Jonkers  
on the manuscript

cp-2018-112: What climate signal is contained in decadal to centennial scale isotope variations from Antarctic ice cores?  
by Thomas Münch and Thomas Laepple

Dear Lukas Jonkers,

below you find our answer to your comment on the above mentioned manuscript; your comment is set in normal font, our answers (author comment, AC) in *green italic font*.

-----  
Even though the manuscript is based on data that have already been published elsewhere, the following points will add to the reproducibility of your results:

- Please include a data availability statement, including data citations, for the data used (DML and WAIS ice cores and ERA Interim reanalysis data).

*AC:*

*We will include a data availability statement to the revised manuscript including the data citations for the used DML, WAIS and ERA-Interim data and add the respective references to the reference list.*

- Please consider to make code used in your study publicly available in online repository.

*AC:*

*We will add a code availability statement to the revised manuscript which will include a link to an online repository where the code used in our study will be made available.*

*Thomas Münch and Thomas Laepple*
